# Supplementary material for: Photoluminescence and Temperature Sensing Properties of Bi3+/Sm3+ Co-Doped La2MgSnO6 Phosphor for Optical Thermometer
Source: MDPI journal article supplement (doi:10.3390/cryst13070991), 2023-06-21
Supplement: s1 [file s1]

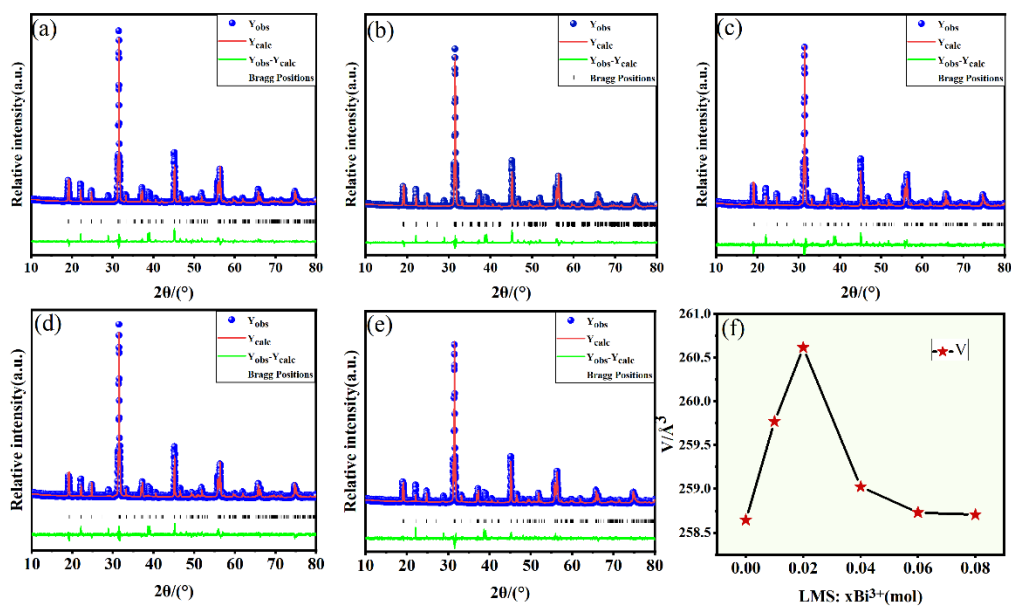

Figure. S1. (a) - (e) Refined maps of LMS:  $x\text{Bi}^{3+}$  ( $x=0.01-0.08$ ), respectively; (f) variation in cell volume.

Table S1. Cell parameters and refinement data of LMS:  $x\text{Bi}^{3+}$  ( $x = 0.01-0.08$ ).

| Formula                         | $0.01\text{Bi}^{3+}$             | $0.02\text{Bi}^{3+}$             | $0.04\text{Bi}^{3+}$             | $0.06\text{Bi}^{3+}$             | $0.08\text{Bi}^{3+}$              |
|---------------------------------|----------------------------------|----------------------------------|----------------------------------|----------------------------------|-----------------------------------|
| Space group                     | $P2_1/n$                         | $P2_1/n$                         | $P2_1/n$                         | $P2_1/n$                         | $P2_1/n$                          |
| Cell-parameters( $\text{\AA}$ ) | a=5.6453<br>b=5.7294<br>c=8.0313 | a=5.6503<br>b=5.7369<br>c=8.0397 | a=5.6387<br>b=5.7246<br>c=8.0242 | a=5.6369<br>b=5.7225<br>c=8.0208 | a=5.6364<br>b=5.72769<br>c=8.0203 |
| Volume( $\text{\AA}^3$ )        | 259.77                           | 260.61                           | 259.02                           | 258.73                           | 258.70                            |
| $R_{\text{wp}}(\%)$             | 9.72                             | 9.35                             | 9.83                             | 9.76                             | 9.40                              |
| $R_{\text{p}}(\%)$              | 6.43                             | 6.01                             | 6.51                             | 6.27                             | 5.98                              |
| $\chi^2(\%)$                    | 2.44                             | 2.19                             | 2.59                             | 2.37                             | 2.55                              |

Table S2. Cation bond length information in matrix LMS.

| M-O bands  | Distance(Å) | M-O bands  | Distance(Å) |
|------------|-------------|------------|-------------|
| Mg1-O1     | 1.890       | Mg2/Sn-O1  | 2.730       |
| Mg1-O1     | 1.890       | Mg2/Sn-O1  | 2.730       |
| Mg1-O2     | 2.190       | Mg2/Sn-O2  | 1.970       |
| Mg1-O2     | 2.190       | Mg2/Sn-O2  | 1.970       |
| Mg1-O3     | 1.992       | Mg2/Sn-O3  | 2.0228      |
| Mg1-O3     | 1.992       | Mg2/Sn-O3  | 2.0228      |
| Mean value | 2.024       | Mean value | 2.240       |

(Follow the above table)

| M-O bands  | Distance(Å) |
|------------|-------------|
| La-O1      | 2.300       |
| La-O1      | 2.350       |
| La-O2      | 2.940       |
| La-O2      | 2.440       |
| La-O2      | 2.510       |
| La-O3      | 3.470       |
| La-O3      | 3.246       |
| Mean value | 2.750       |

Table S3. Cation bond length information in LMS: 0.02Bi<sup>3+</sup>.

| M-O bands  | Distance(Å) | M-O bands  | Distance(Å) |
|------------|-------------|------------|-------------|
| Mg1-O1     | 2.403       | Mg2/Sn-O1  | 2.170       |
| Mg1-O1     | 2.403       | Mg2/Sn-O1  | 2.170       |
| Mg1-O2     | 1.927       | Mg2/Sn-O2  | 2.124       |
| Mg1-O2     | 1.927       | Mg2/Sn-O2  | 2.124       |
| Mg1-O3     | 2.032       | Mg2/Sn-O3  | 2.041       |
| Mg1-O3     | 2.032       | Mg2/Sn-O3  | 2.041       |
| Mean value | 2.120       | Mean value | 2.111       |

(Follow the above table)

| M-O bands  | Distance(Å) |
|------------|-------------|
| La-O1      | 3.170       |
| La-O1      | 3.240       |
| La-O2      | 2.481       |
| La-O2      | 2.670       |
| La-O2      | 2.980       |
| La-O3      | 3.370       |
| La-O3      | 2.480       |
| Mean value | 2.913       |

Table S4. “Tolerance factor” of LMS:  $x\text{Bi}^{3+}$ .

| LMS: $x\text{Bi}^{3+}$ | $T_f$  |
|------------------------|--------|
| x=0                    | 0.8400 |
| x=0.01                 | 0.8398 |
| x=0.02                 | 0.8395 |
| x=0.04                 | 0.8391 |
| x=0.06                 | 0.8386 |
| x=0.08                 | 0.8381 |
